# Supplementary material for: Fully bayesian longitudinal unsupervised learning for the assessment and visualization of AD heterogeneity and progression
Source: publisher site journal article supplement (doi:10.18632/aging.103623), 2020-07-09
Supplement: Supplementary file 3 [file aging-v12i13-103623-supplementary-material-SD3.docx]

## SUPPLEMENTARY TABLES

Please browse Full Text version to see the data of Supplementary Tables 1 and 2.

**Supplementary Table 1. Demographic and clinical characteristics of the clusters.**

**Supplementary Table 2. Model assessment.**

**Supplementary Table 3. List of cortical and subcortical ROIs that were included in the analysis.**

| <b>Cortical regions (thickness)</b> | <b>Subcortical regions (volume)</b> |
|-------------------------------------|-------------------------------------|
| Banks superior temporal sulcus      | Thalamus-Proper                     |
| Caudal anterior-cingulate cortex    | Caudate                             |
| Caudal middle frontal gyrus         | Putamen                             |
| Cuneus cortex                       | Pallidum                            |
| Entorhinal cortex                   | Hippocampus                         |
| Fusiform gyrus                      | Amygdala                            |
| Inferior parietal cortex            | Accumbens-area                      |
| Inferior temporal gyrus             |                                     |
| Isthmus–cingulate cortex            |                                     |
| Lateral occipital cortex            |                                     |
| Lateral orbital frontal cortex      |                                     |
| Lingual gyrus                       |                                     |
| Medial orbital frontal cortex       |                                     |
| Middle temporal gyrus               |                                     |
| Parahippocampal gyrus               |                                     |
| Paracentral lobule                  |                                     |
| Pars opercularis                    |                                     |
| Pars orbitalis                      |                                     |
| Pars triangularis                   |                                     |
| Pericalcarine cortex                |                                     |
| Postcentral gyrus                   |                                     |
| Posterior-cingulate cortex          |                                     |
| Precentral gyrus                    |                                     |
| Precuneus cortex                    |                                     |
| Rostral anterior cingulate cortex   |                                     |
| Rostral middle frontal gyrus        |                                     |
| Superior frontal gyrus              |                                     |
| Superior parietal cortex            |                                     |
| Superior temporal gyrus             |                                     |
| Supramarginal gyrus                 |                                     |
| Frontal pole                        |                                     |
| Temporal pole                       |                                     |
| Transverse temporal cortex          |                                     |
| Insula cortex                       |                                     |

**Supplementary Table 4. Individual images of outlier clusters and HPD uncertain group.**

| RID  | Group | Sex | Age | Age at the<br>AD onset | Years of<br>Education | APGEN<br>1 | APGEN<br>2 | CSF Abeta<br>42 | CSF Ptau<br>181 | CSF Alpha<br>synuclein | MMSE<br>score | MMSE<br>Pentagon |
|------|-------|-----|-----|------------------------|-----------------------|------------|------------|-----------------|-----------------|------------------------|---------------|------------------|
| 404  | 7     | F   | 88  | 84                     | 14                    | 3          | 3          | 234             | 32              | 1,3                    | 20            | 2                |
| 404  | 7     | F   | 89  | 84                     | 14                    | 3          | 3          | 234             | 32              | 1,3                    | 22            | 1                |
| 404  | 7     | F   | 90  | 84                     | 14                    | 3          | 3          | 234             | 32              | 1,3                    | 20            | 1                |
| 1341 | 8     | F   | 72  | 68                     | 12                    | 3          | 4          | 136             | 37              | 1,0                    | 24            | 1                |
| 1341 | 8     | F   | 73  | 68                     | 12                    | 3          | 4          | 136             | 37              | 1,0                    | 22            | 1                |
| 1341 | 8     | F   | 74  | 68                     | 12                    | 3          | 4          | 136             | 37              | 1,0                    | 23            | 1                |
| 724  | 8     | M   | 79  | 77                     | 20                    | 3          | 3          | 143             | 45              | 1,0                    | 21            | 2                |
| 724  | 8     | M   | 80  | 77                     | 20                    | 3          | 3          | 143             | 45              | 1,0                    | 19            | 2                |
| 724  | 8     | M   | 81  | 77                     | 20                    | 3          | 3          | 143             | 45              | 1,0                    | 6             | 2                |
| 1281 | HPD   | F   | 78  | 68                     | 16                    | 4          | 4          | 94              | 41              | 0,7                    | 25            | 2                |
| 1281 | HPD   | F   | 79  | 68                     | 16                    | 4          | 4          | 94              | 41              | 0,7                    | 24            | 1                |
| 1281 | HPD   | F   | 80  | 68                     | 16                    | 4          | 4          | 94              | 41              | 0,7                    | 21            | 1                |
| 753  | HPD   | M   | 65  | 63                     | 16                    | 4          | 4          | 129             | 62              | 4,2                    | 24            | 1                |
| 753  | HPD   | M   | 66  | 63                     | 16                    | 4          | 4          | 129             | 62              | 4,2                    | 20            | 1                |
| 753  | HPD   | M   | 67  | 63                     | 16                    | 4          | 4          | 129             | 62              | 4,2                    | 17            | 1                |
| 852  | HPD   | F   | 84  | 83                     | 18                    | 3          | 4          | 131             | 32              | NA                     | 24            | 1                |
| 852  | HPD   | F   | 85  | 83                     | 18                    | 3          | 4          | 131             | 32              | NA                     | 22            | 1                |

The variable group here has three different values: 1 = Cluster 1, 7= cluster 7, HPD = High posterior density interval uncertain classification. APGEN 1 and 2 refer to the Apoe E4 alleles (3 is an Apoe E3 carrier and 4 is and Apoe E4 carrier). CSF values are in pg/ml.
